1  
2 ***“They provide the right kind of support.” A qualitative study of preferences for***  
3 **differentiated service delivery location among recipients of antiretroviral therapy at**  
4 **Lighthouse Trust in Lilongwe Malawi**

5  
6  
7 Lisa Orii<sup>1</sup>, Kate S. Wilson<sup>2</sup>, Jacqueline Huwa<sup>3</sup>, Christine Kiruthu-Kamamia<sup>3</sup>, Odala Sande<sup>3</sup>,  
8 Agness Thawani<sup>3</sup>, Astrid Berner-Rodoreda<sup>4</sup>, Evelyn Viola<sup>3</sup>, Hannock Tweya<sup>2,5</sup>, Petros Tembo<sup>3</sup>,  
9 Wapu Masambuka<sup>3</sup>, Richard Anderson<sup>1</sup>, & Caryl Feldacker<sup>2,5\*</sup>

10  
11 <sup>1</sup> Paul G. Allen School of Computer Science & Engineering, University of Washington, Seattle,  
12 Washington, United States of America

13 <sup>2</sup> Department of Global Health, University of Washington, Seattle, Washington, United States of  
14 America

15 <sup>3</sup> Lighthouse Trust, Lilongwe, Malawi

16 <sup>4</sup> Faculty of Medicine, Heidelberg Institute of Global Health, Heidelberg University, Heidelberg,  
17 Germany

18 <sup>5</sup> International Training and Education Center for Health (I-TECH), University of Washington,  
19 Seattle, Washington, United States of America

20  
21 \* Corresponding author

22 E-mail: [cfeld@uw.edu](mailto:cfeld@uw.edu)

## 23 **Abstract**

24

25 Differentiated service delivery (DSD) models for antiretroviral therapy (ART) allow stable  
26 recipients of care (RoC) to receive multi-month ART drug refills and complete rapid reviews in  
27 community sites. As DSD options expand across sub-Saharan Africa, RoC's preferences and  
28 perspectives on community- versus clinic-based care models warrants attention. We describe the  
29 factors that influence RoC choice of ART delivery approaches at Lighthouse Trust (LT) clinics  
30 and community-based DSD sites in Lilongwe, Malawi. We conducted eight focus group  
31 discussions (FGDs) among LT RoC in the Nurse-led Community-based ART Program (NCAP)  
32 (n=4) and in clinic settings (n=4) to explore opinions, preferences, and perceptions about ART  
33 service delivery. FGDs were conducted and recorded in Chichewa and then translated and  
34 transcribed into English for analysis. Data was analyzed using thematic analysis and findings  
35 discussed with the LT and NCAP teams to jointly reflect on the findings. Sixty-three participants  
36 took part in the qualitative study. Results were largely similar across care locations. In both NCAP  
37 and clinic FGDs, RoC appreciated the convenience of integrating their appointment visits at their  
38 chosen care location into their daily lives, though some RoC traveled far to access LT's high  
39 quality of care. RoC were satisfied with the quality of the care they received at their location of  
40 choice. Privacy protection was an important consideration for choosing care models. At LT clinics,  
41 RoC highlighted the importance of physical separation between LT's HIV-specific service site and  
42 other service sites. In NCAP, RoC expressed that their choice of care model was reinforced by the  
43 sense of mutual support that they received through the peer support model. At LT, RoC in both  
44 clinic and NCAP care models expressed satisfaction with their chosen care model and preferred  
45 that choice over alternative options and locations. Overall, LT RoC appreciated the quality of care,

46 the respectful provider-to-patient interactions, and the attention to privacy at community and clinic  
47 sites. These findings suggest continued emphasis on offering choices to RoC on where and how  
48 they receive ART delivery approaches may support ongoing engagement in care.

49

## 50 **Introduction**

51 To reach the global target of eliminating new infections by 2030 [1], health systems in Sub-  
52 Saharan Africa (SSA) must adapt existing resources to increasing numbers of recipients of care  
53 (RoC) on lifelong HIV care and treatment. Malawi has 950,000 adults aged 15 and over living  
54 with HIV (7.1% prevalence), of whom 92% receive antiretroviral therapy (ART) [14]. Since 2017,  
55 many countries have adopted differentiated service delivery (DSD) models, where RoC with  
56 suppressed viral load and good antiretroviral therapy (ART) adherence can receive multi-month  
57 drug refills to reduce clinic visits and receive ART services in community sites [2]. DSD models  
58 were designed to be more client-centered and efficient than standard monthly clinic visit models,  
59 although there is limited evidence on comparative feasibility, quality, or effectiveness between  
60 different models or settings [2,3]. One randomized trial in Zimbabwe found that retention and viral  
61 suppression outcomes were similar between RoC receiving 3-month refills from community sites  
62 compared to those receiving 3-month refills at clinics, suggesting that community-based ART  
63 models are as effective as clinic based extended refills [4]. Recent qualitative studies explored  
64 RoC and provider experiences in HIV care with DSDs. RoC in community-based models reported  
65 that fewer clinic visits reduce their clinic wait times and transportation costs [5-7], increase peer  
66 support [8,9] and improve treatment adherence [10]. By contrast, clinic-based RoC in SSA  
67 reported preferring clinic-based care to community-based refill options because the clinics were

68 near work [5] or they feared stigma and discrimination of inadvertent disclosure of their HIV status  
69 if they collected ART at a community venue [5,6,8,11,12]. Healthcare providers also reported that  
70 RoC's concerns around confidentiality and unwanted disclosure of HIV status posed barriers to  
71 using clinic-based DSD models [5]. It is possible that RoC may have different reasons for  
72 accessing ART care at clinics or community sites, and perspectives from RoC in routine HIV care  
73 with both clinic and community-based DSD options are lacking.

74         Given national efforts to expand DSD options in SSA to improve RoC-centered care in  
75 clinic and community sites [13], RoC preferences, opinions, and perspectives on care models  
76 warrant further attention. To address this gap, we conducted a qualitative study among RoC to  
77 explore opinions, preferences, and perceptions about ART service delivery locations among both  
78 community- and clinic-based RoC at Lighthouse Trust (LT) in Lilongwe, Malawi, a large, public  
79 ART provider with over 38,000 RoC in two urban clinics and 120 community-based care sites.  
80 This qualitative study may inform service delivery considerations in other low-resource ART  
81 programs in the region.

82

## 83 **Methods**

### 84 **Setting**

85         LT supports the ART program of the Malawi Ministry of Health and provides integrated  
86 HIV prevention, treatment, care, and support services in five high-volume Center of Excellence  
87 clinics across the country. LT is widely recognized for its innovations and efforts to improve the  
88 quality of care over two decades of HIV-related service delivery [15-22]. In urban Lilongwe, LT

89 runs two, large flagship clinics with 25,148 RoC at Martin Preuss Center at Bwaila Hospital and  
90 12,853 at the Lighthouse clinic at Kamuzu Central Hospital. At these flagship clinics, viral load  
91 suppression at 12 month's ART averaged >90% across all sites according to routine monitoring  
92 and evaluation data,. LT also supports care at 9 peri-urban satellite sites in Lilongwe district. LT  
93 implements the same training, policy, and practices at all sites, including use of the Malawi  
94 Ministry of Health's real-time, point-of-care electronic medical record system. LT implements  
95 several DSD approaches in its clinics, including expanded early and late service hours, adolescent-  
96 friendly programs, integrated family planning services, and non-communicable disease care. LT  
97 also operates a large-scale, community-based DSD model, the Nurse-led Community-based ART  
98 Program (NCAP). In NCAP, Community Nurses provide ART services to eligible RoC referred  
99 from all clinics. RoC from LT clinics may be referred to NCAP if they meet the following criteria:  
100 1) at least 18 years of age; 2) clinically stable; 3) on ART for at least 6 months; and 4) member of  
101 a peer support group. All NCAP clients previously received services at LT clinics. NCAP is  
102 provided in the community during routinely scheduled peer support meetings held in churches,  
103 community centers, schools, or other gathering places according to the peer group preference. RoC  
104 meet with a community nurse at that same location every 3-6 months. In 2023, over 5,195 RoC in  
105 120 groups in Lilongwe were enrolled in NCAP and reported viral load suppression among NCAP  
106 RoC on treatment was ~95%. NCAP receives high levels of client satisfaction and healthcare  
107 worker support for expansion [6].

## 108 **Study design and population**

109 As part of a larger qualitative study on data privacy and security in both community and  
110 clinic settings [23], we conducted eight focus group discussions (FGDs) with LT RoC at both

111 flagship and NCAP sites from September 7, 2022 to October 14, 2022. The facilitator was a trained  
112 Malawian LT qualitative researcher who speaks both Chichewa (the most common language in  
113 Malawi) and English. We used purposeful sampling through clinic and community-based care  
114 locations to 4 FGDs per setting. LT staff in both settings screened RoC study eligibility: 1) age 18  
115 and above; 2) at least a primary education; 3) written voluntary consent to FGD participation; and  
116 4) permission to audio record the discussion. FGDs were conducted at participants' routine care  
117 location, either the clinic or NCAP site.

## 118 **Data collection**

119 Four FGDs took place at clinics and four in NCAP sites. Each FGD included seven to nine  
120 participants. FGDs were conducted using a semi-structured discussion guide. The guide explored  
121 RoC's experiences with health care in their preferred care location. In this study, we focus on  
122 reasons for accessing ART services at their chosen care model and consideration for alternative  
123 care locations. A Malawian qualitative researcher facilitated all FGDs in Chichewa. FGDs were  
124 audio recorded with consent from all participants and lasted about an hour. After each FGD, the  
125 facilitator translated and transcribed the FGDs into English and completed a debrief report  
126 summarizing key points, participants' openness, and group dynamics. The research team  
127 reviewed and discussed all debrief reports.

## 128 **Analysis**

129 FGD transcripts were analyzed using thematic analysis, combining deductive and inductive  
130 steps [24]. Two team members (located in the United States and who did not conduct the FGDs)  
131 conducted a detailed reading of the full-length transcripts and developed an initial codebook

132 restricted to the questions about care model preferences, including concepts related to stigma, in  
133 ATLAS.ti v.8. A second team member reviewed the code application and resolved disagreements  
134 through discussion with the main analyst. Final coding, discussion, and next steps were refined  
135 through highly participatory discussion between the analysis team and LT study members.

## 136 **Ethical considerations**

137 This study was approved by the University of Washington Institutional Review Board  
138 (STUDY00013936) and the National Health Sciences Research Committee of Malawi (# 2968).  
139 All participants provided written informed consent. All participants were compensated with  
140 K10310.00 (approximately 10 USD) for their time. This study was conducted in accordance with  
141 the LT team and researchers whose primary interest is to improve the quality of care of RoC.

## 142 **Positionality**

143 The author group consists of international and local researchers. The group benefited from  
144 in-depth local knowledge and experience of HIV studies across various geographic settings. All  
145 authors were attentive to iterative process of data review and reflection [25] to strengthen the  
146 study's methodological rigor, transparency, and inclusion throughout the research process,  
147 especially during data collection, analysis, and results reporting.

148

## 149 **Results**

150 Overall, 63 participants took part in this study. The median age was 47 (IQR 41-56), 81%  
151 were female, 51% received care from NCAP and 49% from clinics (Table 1). Overall, participants

152 from both NCAP and the clinics reported positive experiences with their chosen care model. We  
153 identified four themes about participants' reasons for choosing their care model: (1) convenience  
154 including integration into daily activities and efficiency; (2) high quality of care; (3) assurance of  
155 privacy; and (4) sense of mutual support. We compare findings from clinic and NCAP discussions.  
156

157 **Table 1. Gender and Age Distribution of FGD Participants**

| Site of Care      | Participants per Group (n);<br>n% Female | Mean Age |
|-------------------|------------------------------------------|----------|
| <i>Clinic FGD</i> |                                          |          |
| 1                 | 8; 6 (75%)                               | 41       |
| 2                 | 7; 5 females (71%)                       | 42       |
| 3                 | 8; 6 females (75%)                       | 36       |
| 4                 | 8; 5 females (63%)                       | 57       |
| <i>NCAP FGD</i>   |                                          |          |
| 1                 | 8; 6 females (75%)                       | 54       |
| 2                 | 7; 7 females (100%)                      | 49       |
| 3                 | 8; 7 females (88%)                       | 51       |
| 4                 | 9; 9 females (100%)                      | 47       |
| Total             | 63 (81%)                                 | 47       |

158



## 159 **Recipients of care wanted convenience**

160 The convenience of integrating appointment visits into daily routines influenced  
161 participants' choice of care model. This sentiment was expressed more strongly among participants  
162 from NCAP than the clinics. Short travel distance was a major factor that influenced participants'  
163 choices.

164  
165 *“I am thankful for this arrangement where we must be getting medication in the community.*  
166 *Sometimes we leave some activities in the community, we come here and get medication*  
167 *and attend to activities like funerals within the community. In addition, when we are sick,*  
168 *we can get medication here when the providers visit the community...Bringing the*  
169 *community ART program has helped us a lot. We can leave beans boiling on fire, come*  
170 *here and get back home, and still find the beans boiling. We are very grateful.” – P5-*  
171 *NCAP2*

172  
173 For some clinic-based participants, short distance to the urban clinic and extended hours of  
174 operation enabled them to integrate clinic visits into their work schedule.

175  
176 *“I like this clinic because it is near to my home, as such I do not struggle with transport.*  
177 *In addition to that, they open the clinic early in the morning. I can go back to work once I*  
178 *collect my medication.” – P1-Clinic2*

179  
180 Many NCAP participants compared their current travel to their previous clinic-based care,  
181 saying that the distance, travel time, wait time, and costs associated with accessing services

182 reduced after opting into NCAP. Further, participants reported that lower costs helped them attend  
183 support group meetings and receive consistent ART.

184

185 *“Another thing is about transport, some fail to report to the clinic because they do not have*  
186 *means of transport and cannot walk to the clinic, they end up missing appointment dates*  
187 *there by not being able to get medication. Getting medication in the community has helped*  
188 *us a lot because we get here easily, we can just walk to the site.” – P6-NCAP2*

## 189 **Recipients of care valued high quality of care**

190 In FGDs from both clinics and NCAP, RoCs expressed that providers respected and cared  
191 for them kindly, which affirmed their choice of care location. At the clinics, participants noted that  
192 nurses offered adherence counseling and emotional support to encourage them to live healthy lives  
193 and accept their serostatus.

194

195 *“Since I started taking medication. I am encouraged especially because of the counseling*  
196 *that is provided at Lighthouse so that one accepts their status. They provide counseling on*  
197 *being adherent and other issues that make one encouraged and be healthy (as it was*  
198 *before).” – P1-Clinic3*

199

200 Clinic-based participants also compared the quality of care at LT clinics to that of other  
201 hospitals or clinics, making informed choices on which clinic to attend: *“There are some sites*  
202 *where one would be disappointed because they have been shouted at. Even though I live far from*

203 *here, I make sure that I report to the [Lighthouse] clinic” (P3-Clinic2).* Distance was therefore not  
204 a major consideration for some RoC when choosing care locations.

205  
206 *“Even though I live far from here, I heard that they manage the disease very well at this*  
207 *clinic. When I was referred here, I noted that there is expertise at this clinic. As I continued*  
208 *collecting medication here, I noticed that they have good reception. During my first visit,*  
209 *I noted that there is respect and love for the client, this is different from what I experienced*  
210 *in other sites. It made me happy, and I decided that even though I live far from the clinic I*  
211 *will be reporting to this clinic.” – P6-Clinic2*

212  
213 NCAP participants reported that community nurses were more respectful and friendly as  
214 compared to clinic providers. This experience reflected a common perception that NCAP providers  
215 were interested in the lives of RoC, which encouraged RoC to openly share health issues with  
216 nurses. One participant characterized NCAP providers by noting that, *“they warmly welcome us;*  
217 *they are happy and interested in us. In addition to that they are attentive when we are sharing our*  
218 *issues with them, they provide the right kind of support” (P6-NCAP4).*

219 Providers offering responsive and appropriate care that was easy to understand was seen  
220 as another incentive for staying in NCAP. Specifically, participants appreciated how NCAP  
221 providers offered referrals and reminders for other preventative healthcare.

222  
223 *“Our providers provide services appropriately, whenever we have issues in addition to the*  
224 *medication that we get, they act so fast to refer one to the clinic where they can get*  
225 *assistance. Whenever they have something to share with us, they make sure that they*

226 *deliver the information in a proper manner so that we can understand. We are so happy*  
227 *with the doctors who come here.” – P4-NCAP2*

## 228 **Recipients of care wanted their privacy protected**

229 Privacy was an important consideration for all participants in choosing their care model.  
230 Clinic-based participants chose longer travel times and distance to receive care at LT to avoid  
231 encountering people from their communities. The primary reason was fear of unwanted disclosure  
232 of HIV status and discrimination.

233  
234 *“I also come from far, but I still come here because I believe my privacy can be maintained*  
235 *because it is far from my home. I did not meet people from my community when I came*  
236 *here. There are others who discriminate against others once they learn their HIV status.*  
237 *When I came here my confidentiality is maintained.” – P4-Clinic2*

238  
239 Many participants reported that they felt reassured that they would not be seen by people  
240 they knew because the LT ART clinics are in a separate section of the hospital.

241  
242 *“I am happy, nowadays. Those of us who are positive and on treatment are stigmatized,*  
243 *we are seen differently. I am happy because they separated the clinic, it isolates us from*  
244 *them, and they do not know where we go and what we do there. It makes me happy to come*  
245 *to this clinic.” – P5-Clinic1*

246

247           Within the LT clinic, participants felt that confidentiality was well-maintained, especially  
248 through the privacy that was given during conversations between RoC and providers.

249  
250           *“When we get into the nurse’s room, they tell us to close the door. It is only the client and*  
251 *the nurse in the room. So, whatever we discuss is confidential, it remains between the nurse*  
252 *and the client. They maintain our confidentiality.” – P2-Clinic3*

253  
254           Conversely, several NCAP participants reported they had more privacy at NCAP sites. One  
255 main reason for this was the proximity between a LT clinic and other service areas of the larger  
256 hospital campus that offered non-HIV services. Some participants expressed discomfort with being  
257 seen visiting LT by others including guardians sent to LT by fellow RoC. Consequently, fear of  
258 unwanted disclosure of positive HIV status deterred some RoC from reporting to the clinics for  
259 their appointments.

260  
261           *“Sometimes it happens that one has sent a guardian, and you meet them (referring to the*  
262 *guardian). It then becomes embarrassing when you meet at home. If the person that you*  
263 *met is not able to keep it to themselves then they will tell other people that you met at the*  
264 *clinic and that you are taking medication. That made others not to report to the clinic with*  
265 *fear that they will meet other people who know them.” – P8-NCAP3*

266  
267           RoC who chose NCAP also explained that physical separation of spaces at NCAP sites  
268 enhanced the sense of privacy.

269

270           *“When the nurses get here, there is a distance between them and the recipients of care,*  
271           *even if one looks at them there is nothing that they can hear. There was another place*  
272           *where we had a side room, where one would not hear what is being discussed no matter*  
273           *how hard they try to pay attention. There is a distance between other recipients of care and*  
274           *the nurse.” – P3-NCAP4*

275

276           However, some RoC chose to remain in clinic-based care because of the risk of unwanted  
277 disclosure through NCAP participation.

278

279           *“In the past there were groups and once you join you were connected to a smaller group*  
280           *where you were visited. But there were the same people (from the group) who were*  
281           *disclosing other people’s status, yet this is confidential. A lot of people thought that those*  
282           *groups were not good, and a lot of people decided to drop out.” – P7-Clinic4*

## 283   **Choice of care model reinforced by sense of mutual support**

284           There was appreciation for peer support exclusively among NCAP participants. The sense  
285 of mutual support expressed by NCAP participants was less related to the physical location of the  
286 NCAP sites. Most NCAP participants reported that the community group model enabled them and  
287 their peers to stay better engaged in care compared to at the clinics. Participants shared how they  
288 supported each other to attend community visits, including volunteering to call or visit other RoC  
289 to remind them to meet.

290

291           *“We are very comfortable. We also encourage each other as clients who report to the*  
292           *community to get medication. We encourage each other that if we have noticed one of our*  
293           *friends is sick and is not aware of the main issue, we visit them. Though we are not*  
294           *volunteers, we tell them the facility where they can get help. It is good to be open.” – P4-*  
295           NCAP2

296  
297           The mutual support between NCAP RoC also enabled them to encourage one another to  
298           seek care for other health issues.

299  
300           *“We are happy to be getting medication in the community. It is a good thing because we*  
301           *encourage each other about health and some of the issues that we face. Unlike at the clinic*  
302           *like [X] or [Y] where there are different people, and it is hard to be free to interact. Here*  
303           *[in the community] we meet too often, and it makes it easy to encourage each other.” – P6-*  
304           NCAP2

305  
306           NCAP participants also felt that they supported the nurses’ role in care delivery. NCAP  
307           RoC and group leaders worked closely with community nurses to track other RoC who missed  
308           their scheduled appointments, which likely helps to reduce the number of defaulters. The  
309           collaboration between the group leader and the nurses also allowed volunteers to deliver  
310           medication to RoC who, for various reasons could not collect them from the nurse, thus  
311           encouraging continuation of care.

312

313           *“We work with the providers, and this has reduced the number of defaulters... We are able*  
314           *to know the appointment dates of the clients and we are able to remind them, when they do*  
315           *not show up to the community distribution point. We follow them up and bring them here.*  
316           *It is unlikely to have defaulters and we have reduced the workload for the providers.” –*  
317           P7-NCAP2  
318

## 319 **Discussion**

320           In this qualitative study to explore RoC preferences for community- or clinic-based ART  
321           care models, we found similar reasons for why both groups chose their community or clinic-based  
322           model reinforcing the value of continuing to offer multiple care settings. Convenience, privacy,  
323           and quality of care were perceived as facilitators for both groups in selecting their preferred care  
324           model. Those in NCAP also commented on the role of peer support in improving their care  
325           experience. Choice of location offered RoC with the flexibility to choose the care model that best  
326           meet their needs, likely boosting satisfaction that could improve motivation to remain in care.  
327           Comparing perspectives of RoC on ART services in two settings run by the same clinical team  
328           enhances the strength of the results. These findings suggest several areas of consideration.

329           RoC in both locations were concerned with privacy and the potential for stigma, making a  
330           deliberate choice to remain in their care location to avoid HIV-related stigma. While DSD is  
331           scaling up, frequently to community settings, previous studies suggest fear of unintended  
332           disclosure as a barrier to uptake of community-based DSD models [5,6,8,11,12,26]. In our study,  
333           some clinic-based RoC compromised travel and time concerns to receive care at LT, rather than  
334           in the community, to avoid being seen receiving HIV-related services. The separation of LT ART



335 clinics from other sections of the hospital enhanced clinic-based RoC's sense of privacy. While  
336 this may be unique to the operation of LT, physical separation of ART clinics from the main facility  
337 likely contributed to the sense of privacy and comfort. These results again reinforce the need for  
338 diverse care setting options.

339 RoC appreciated care models that accommodated their daily routines, underpinning the  
340 importance of designing care models that address the needs and preferences of RoC [30]. RoC  
341 from both clinics and NCAP recognized the importance of integrating appointment visits into their  
342 daily routines. Clinic-based participants appreciated that they could easily fit their visits into their  
343 work schedules,. For NCAP RoC, the proximity of NCAP sites to their homes allowed them to  
344 participate in community activities and household chores.

345 Quality of care was another important consideration in participants' choice of care model.  
346 Clinic-based RoC reported high satisfaction with the static-site teams, which may be attributed to  
347 the comprehensive and advanced care options provided by the LT clinics, allowing easy access to  
348 integrated high-quality care in a single visit. Although some RoC in community-based models may  
349 fear detachment from the formal health system [11,31], NCAP RoC felt that NCAP enabled  
350 comprehensive care through referrals and reminders for other preventative healthcare made by  
351 community nurses. Even more, NCAP RoC preferred the quality of treatment they received from  
352 community nurses over that of clinic nurses, noting their friendliness and respect. Community  
353 nurses attend to few RoC overall, allowing for a more tailored and personalized care approach.  
354 RoC satisfaction with their interactions with community nurses supports the potential for  
355 improving RoC-centered care with DSD models [32].

356 This study complements previous NCAP pilot evaluation [6] that identified the central role  
357 of peer support in supporting health and wellness among NCAP participants. NCAP RoC felt that

358 community-based care brought individuals together for peer support, encouraging them to  
359 overcome barriers to retention. Peer support groups with strong leaders like in NCAP may also  
360 minimize the nurse workload, reflecting potential DSD advantages for both providers and RoC  
361 [33, 34]. In this study, participants continued to appreciate reduced costs and improved  
362 convenience of NCAP, appear satisfied with their care, and value the privacy benefits afforded by  
363 community-based care. However, previous NCAP evaluation noted LT crowding as a primary  
364 reason to switch to NCAP-based care, something that was not identified in this study. NCAP  
365 expansion may have reduced LT wait times, an intended positive result of DSD scale-up.

366 This study also had limitations. First, the flexibility that is offered with NCAP participation  
367 is restricted to eligible LT RoC, not all LT clients. We engaged participants established in care and  
368 their reasons for choosing NCAP or clinic-based care are subject to recall bias. There is potential  
369 loss of nuance in participants' contributions in translating FGDs from Chichewa to English. We  
370 tried to minimize this with the involvement of a Malawian qualitative researcher who conducted  
371 and translated the FGDs into English. Despite limitations, these findings offer useful feedback for  
372 program planners and providers.

## 373 **Conclusion**

374 RoC are making informed choices about where to receive care, considering convenience,  
375 quality of care, protection of privacy, and potential for mutual support. The varying needs,  
376 characteristics, and preferences of RoC underscore that there is no one-size-fits-all care model, but  
377 rather that lifelong HIV care requires flexibility for RoC to choose between clinic-, community-  
378 or other DSD-type models as preferences and life circumstances change. This adaptive and  
379 responsive approach can reduce burdens and concerns that impede access to services and retention

380 in care. Although not all care options are always available to everyone across locations, increased  
381 flexibility for care model changes and allowance for more fluid movement between models may  
382 better meet RoC expectations for convenience, privacy, and quality care, enhancing retention and  
383 satisfaction over time.

## 384 **Acknowledgements**

385 The authors would also like to thank the Lighthouse Trust and its NCAP program team for their  
386 partnership in this research study.

387

## 388 **References**

- 389 1. New report from UNAIDS shows that AIDS can be ended by 2030 and outlines the  
390 path to get there [Internet]. [cited 2023 Nov 3]. Available from:  
391 [https://www.unaids.org/en/resources/presscentre/pressreleaseandstatementarchive/  
392 2023/july/unaids-global-aids-update](https://www.unaids.org/en/resources/presscentre/pressreleaseandstatementarchive/2023/july/unaids-global-aids-update)
- 393 2. Long L, Kuchukhidze S, Pascoe S, Nichols BE, Fox MP, Cele R, et al. Retention in  
394 care and viral suppression in differentiated service delivery models for HIV  
395 treatment delivery in sub-Saharan Africa: a rapid systematic review. *Journal of the*  
396 *International AIDS Society*. 2020;23(11):e25640.
- 397 3. Kuo AP, Roche SD, Mugambi ML, Pintye J, Baeten JM, Bukusi E, et al. The  
398 effectiveness, feasibility and acceptability of HIV service delivery at private  
399 pharmacies in sub-Saharan Africa: a scoping review. *Journal of the International*  
400 *AIDS Society*. 2022;25(10):e26027.

- 401 4. Fatti G, Ngorima-Mabhena N, Mothibi E, Muzenda T, Choto R, Kasu T, et al.  
402 Outcomes of Three- Versus Six-Monthly Dispensing of Antiretroviral Treatment  
403 (ART) for Stable HIV Patients in Community ART Refill Groups: A Cluster-  
404 Randomized Trial in Zimbabwe. *J Acquir Immune Defic Syndr*. 2020 Mar  
405 23;10.1097/QAI.0000000000002333.
- 406 5. Christ B, van Dijk JH, Nyandoro TY, Reichmuth ML, Kunzekwenyika C,  
407 Chammartin F, et al. Availability and experiences of differentiated antiretroviral  
408 therapy delivery at HIV care facilities in rural Zimbabwe: a mixed-method study. *J*  
409 *Int AIDS Soc*. 2022 Aug 25;25(8):e25944.
- 410 6. Sande O, Burtscher D, Kathumba D, Tweya H, Phiri S, Gugsu S. Patient and nurse  
411 perspectives of a nurse-led community-based model of HIV care delivery in Malawi:  
412 a qualitative study. *BMC Public Health*. 2020 May 14;20(1):685.
- 413 7. Bemelmans M, Baert S, Goemaere E, Wilkinson L, Vandendyck M, van Cutsem G,  
414 et al. Community-supported models of care for people on HIV treatment in sub-  
415 Saharan Africa. *Tropical Medicine & International Health*. 2014;19(8):968–77.
- 416 8. Pellicchia U, Baert S, Nundwe S, Bwanali A, Zamadenga B, Metcalf CA, et al. “We  
417 are part of a family”. Benefits and limitations of community ART groups (CAGs) in  
418 Thyolo, Malawi: a qualitative study. *Journal of the International AIDS Society*.  
419 2017;20(1):21374.
- 420 9. Rasschaert F, Telfer B, Lessitala F, Decroo T, Remartinez D, Biot M, et al. A  
421 Qualitative Assessment of a Community Antiretroviral Therapy Group Model in  
422 Tete, Mozambique. *PLOS ONE*. 2014 Mar 20;9(3):e91544.

- 423 10. Tun W, Apicella L, Casalini C, Bikaru D, Mbita G, Jeremiah K, et al. Community-  
424 Based Antiretroviral Therapy (ART) Delivery for Female Sex Workers in Tanzania:  
425 6-Month ART Initiation and Adherence. *AIDS Behav.* 2019 Sep 1;23(2):142–52.
- 426 11. Zakumumpa H, Rujumba J, Kwiringira J, Katureebe C, Spicer N. Understanding  
427 implementation barriers in the national scale-up of differentiated ART delivery in  
428 Uganda. *BMC Health Services Research.* 2020 Mar 17;20(1):222.
- 429 12. Adjetei V, Obiri-Yeboah D, Dornoo B. Differentiated service delivery: a qualitative  
430 study of people living with HIV and accessing care in a tertiary facility in Ghana.  
431 *BMC Health Services Research.* 2019 Feb 4;19(1):95.
- 432 13. Grimsrud A, Wilkinson L. Acceleration of differentiated service delivery for HIV  
433 treatment in sub-Saharan Africa during COVID-19. *Journal of the International*  
434 *AIDS Society.* 2021;24(6):e25704.
- 435 14. New report from UNAIDS shows that AIDS can be ended by 2030 and outlines the  
436 path to get there [Internet]. [cited 2023 Nov 3]. Available from:  
437 [https://www.unaids.org/en/resources/presscentre/pressreleaseandstatementarchive/  
438 2023/july/unaids-global-aids-update](https://www.unaids.org/en/resources/presscentre/pressreleaseandstatementarchive/2023/july/unaids-global-aids-update)
- 439 15. Feldacker C, Tweya H, Keiser O, Weigel R, Kalulu M, Fenner L, et al.  
440 Characteristics of adults and children diagnosed with tuberculosis in Lilongwe,  
441 Malawi: findings from an integrated HIV/TB clinic. *Tropical Medicine &*  
442 *International Health.* 2012;17(9):1108–16.
- 443 16. Huwa J, Tweya H, Mureithi M, Kiruthu-Kamamia C, Oni F, Chintedza J, et al. “It  
444 reminds me and motivates me”: Human-centered design and implementation of an  
445 interactive, SMS-based digital intervention to improve early retention on

- 446 antiretroviral therapy: Usability and acceptability among new initiates in a high-  
447 volume, public clinic in Malawi. PLOS ONE. 2023 Jul 20;18(7):e0278806.
- 448 17. Makombe SD, Hochgesang M, Jahn A, Tweya H, Hedt B, Chuka S, et al. Assessing  
449 the quality of data aggregated by antiretroviral treatment clinics in Malawi. Bull  
450 World Health Organ. 2008 Apr;86(4):310–4.
- 451 18. Phiri S, Khan PY, Grant AD, Gareta D, Tweya H, Kalulu M, et al. Integrated  
452 tuberculosis and HIV care in a resource-limited setting: experience from the Martin  
453 Preuss centre, Malawi. Tropical Medicine & International Health.  
454 2011;16(11):1397–403.
- 455 19. Phiri S, Neuhaan F, Glaser N, Gass T, Chaweza T, Tweya H, et al. The path from a  
456 volunteer initiative to an established institution: evaluating 15 years of the  
457 development and contribution of the Lighthouse trust to the Malawian HIV response.  
458 BMC Health Services Research. 2017 Aug 9;17(1):548.
- 459 20. Tweya H, Ben-Smith A, Kalulu M, Jahn A, Ng’ambi W, Mkandawire E, et al.  
460 Timing of antiretroviral therapy and regimen for HIV-infected patients with  
461 tuberculosis: the effect of revised HIV guidelines in Malawi. BMC Public Health.  
462 2014 Feb 20;14(1):183.
- 463 21. Tweya H, Feldacker C, Gadabu OJ, Ng’ambi W, Mumba SL, Phiri D, et al.  
464 Developing a point-of-care electronic medical record system for TB/HIV co-infected  
465 patients: experiences from Lighthouse Trust, Lilongwe, Malawi. BMC Res Notes.  
466 2016 Mar 5;9:146.
- 467 22. Vorkas CK, Tweya H, Mzinganjira D, Dickie G, Weigel R, Phiri S, et al. Practices  
468 to improve identification of adult antiretroviral therapy failure at the Lighthouse

- 469 Trust clinic in Lilongwe, Malawi. *Tropical Medicine & International Health*.  
470 2012;17(2):169–76.
- 471 23. Orii L, Feldacker C, Tweya H, Anderson R. eHealth Data Security and Privacy:  
472 Perspectives from Diverse Stakeholders in Malawi. *Proceedings of the ACM on*  
473 *Human-Computer Interaction*. Forthcoming.
- 474 24. Braun V, Clarke V. Toward good practice in thematic analysis: Avoiding common  
475 problems and be(com)ing a knowing researcher. *Int J Transgend Health*. 24(1):1–6.
- 476 25. Elo S, Kääriäinen M, Kanste O, Pölkki T, Utriainen K, Kyngäs H. Qualitative  
477 Content Analysis: A Focus on Trustworthiness. *SAGE Open*. 2014 Jan  
478 1;4(1):2158244014522633.
- 479 26. Okere NE, Meta J, Maokola W, Martelli G, Praag E van, Nanche D, et al. Quality  
480 of care in a differentiated HIV service delivery intervention in Tanzania: A mixed-  
481 methods study. *PLOS ONE*. 2022 Mar 15;17(3):e0265307.
- 482 27. Berner-Rodoreda A, Geldsetzer P, Bärnighausen K, Hettema A, Bärnighausen T,  
483 Matse S, et al. “It’s hard for us men to go to the clinic. We naturally have a fear of  
484 hospitals.” Men’s risk perceptions, experiences and program preferences for PrEP:  
485 A mixed methods study in Eswatini. *PLOS ONE*. 2020 Sep 23;15(9):e0237427.
- 486 28. Berner-Rodoreda A, Ngwira E, Alhassan Y, Chione B, Dambe R, Bärnighausen T,  
487 Phiri S, Taegtmeier M, Neuhann F. “Deadly”, “fierce”, “shameful”: notions of  
488 antiretroviral therapy, stigma and masculinities intersecting men’s life-course in  
489 Blantyre, Malawi. *BMC Public Health*. 2021 Dec;21:1-3.
- 490 29. Mudavanhu M, West NS, Schwartz SR, Mutunga L, Keyser V, Bassett J, et al.  
491 Perceptions of Community and Clinic-Based Adherence Clubs for Patients Stable on

- 492 Antiretroviral Treatment: A Mixed Methods Study. *AIDS Behav.* 2020 Apr  
493 1;24(4):1197–206.
- 494 30. Mukumbang FC, Ndlovu S, van Wyk B. Comparing Patients’ Experiences in Three  
495 Differentiated Service Delivery Models for HIV Treatment in South Africa. *Qual  
496 Health Res.* 2022 Jan;32(2):238–54.
- 497 31. Walusaga HAG, Atuyambe LM, Muddu M, Mpirirwe R, Nangendo J, Kalibbala D,  
498 et al. Perceptions and factors associated with the uptake of the community client-led  
499 antiretroviral therapy delivery model (CCLAD) at a large urban clinic in Uganda: a  
500 mixed methods study. *BMC Health Services Research.* 2023 Oct 26;23(1):1165.
- 501 32. Ehrenkranz P, Grimsrud A, Holmes CB, Preko P, Rabkin M. Expanding the Vision  
502 for Differentiated Service Delivery: A Call for More Inclusive and Truly Patient-  
503 Centered Care for People Living With HIV. *J Acquir Immune Defic Syndr.* 2021  
504 Feb 1;86(2):147–52.
- 505 33. Decroo T, Van Damme W, Kegels G, Remartinez D, Rasschaert F. Are Expert  
506 Patients an Untapped Resource for ART Provision in Sub-Saharan Africa? *AIDS  
507 Research and Treatment.* 2012 Apr 19;2012:e749718.
- 508 34. Sharer M, Davis N, Makina N, Duffy M, Eagan S. Differentiated Antiretroviral  
509 Therapy Delivery: Implementation Barriers and Enablers in South Africa. *J Assoc  
510 Nurses AIDS Care.* 2019;30(5):511–20.
